# Supplementary material for: Remarkable improvement in phosgene detection with a defect-engineered phosphorene sensor: first-principles calculations
Source: Royal Society of Chemistry journal article supplement (doi:10.1039/d0cp00427h), 2020-01-01
Supplement: d0cp00427h1.pdf [file d0cp00427h1.pdf]

## Supplementary Material

# **Remarkable Improvement in Phosgene Detection with Defect-Engineered Phosphorene Sensor: First- Principles Calculations**

Mehdi Ghambarian<sup>1</sup>, Zahra Azizi<sup>2</sup>, Mohammad Ghashghaee<sup>3,\*</sup>

<sup>1</sup> *Gas Conversion Department, Faculty of Petrochemicals, Iran Polymer and Petrochemical Institute, P.O. Box 14975-112, Tehran, Iran*

<sup>2</sup> *Department of Chemistry, Karaj Branch, Islamic Azad University, P.O. Box 31485-313, Karaj, Iran*

<sup>3</sup> *Faculty of Petrochemicals, Iran Polymer and Petrochemical Institute, P.O. Box 14975-112, Tehran, Iran*

\* Corresponding author. Tel.: +98 21 48662481; fax: +98 21 44787032. E-mail address: [m.ghashghaee@ippi.ac.ir](mailto:m.ghashghaee@ippi.ac.ir).

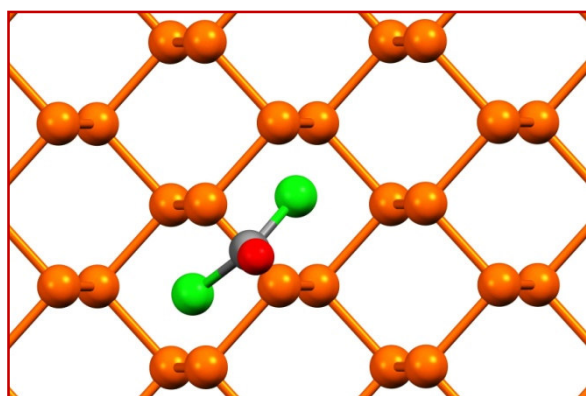

P1a (Top View)

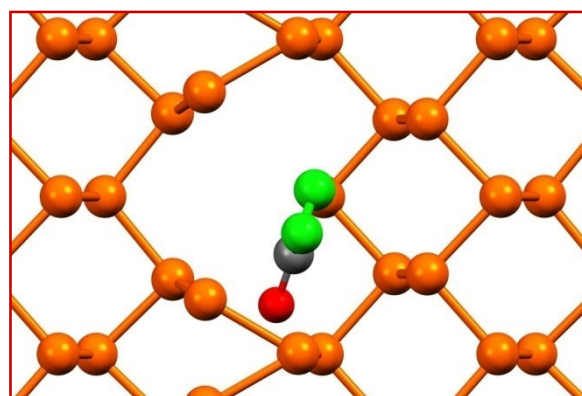

P2a (Top View)

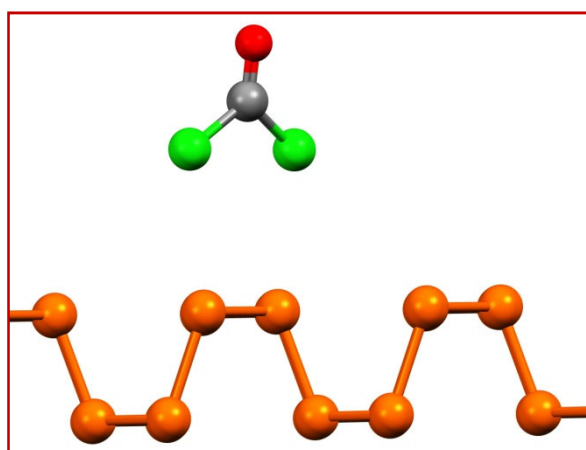

P1a (Side View)

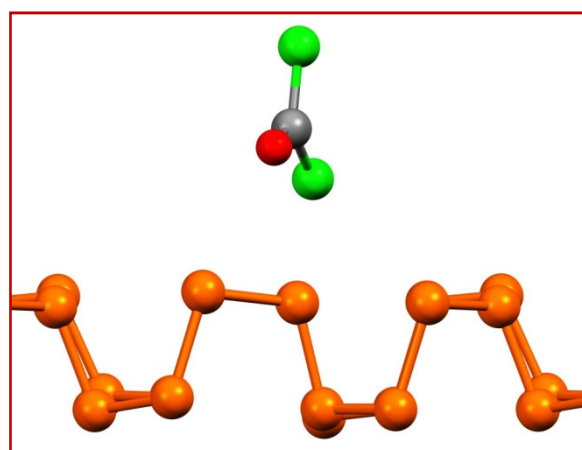

P2a (Side View)

**Figure S1.** Alternative configurations for the phosgene stabilization on phosphorene sensors at the PBE/SVP level of theory.

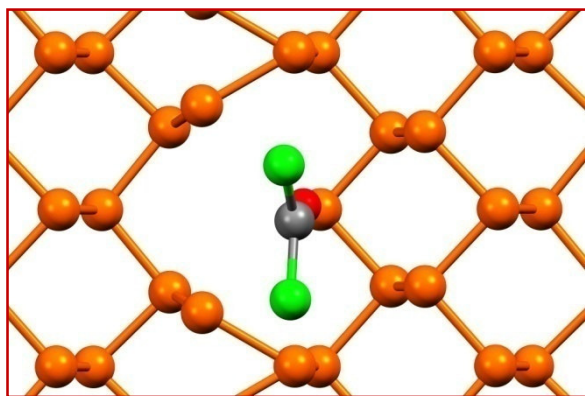

P2b (Top View)

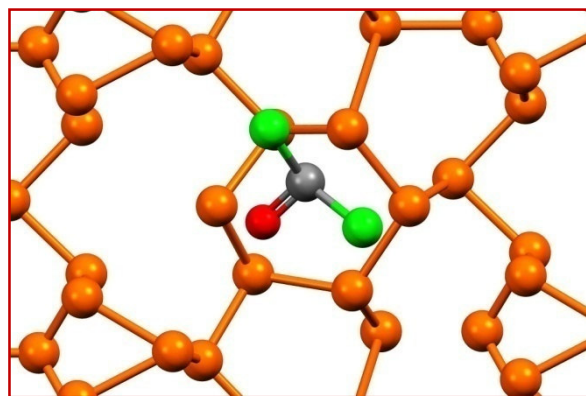

P2c (Top View)

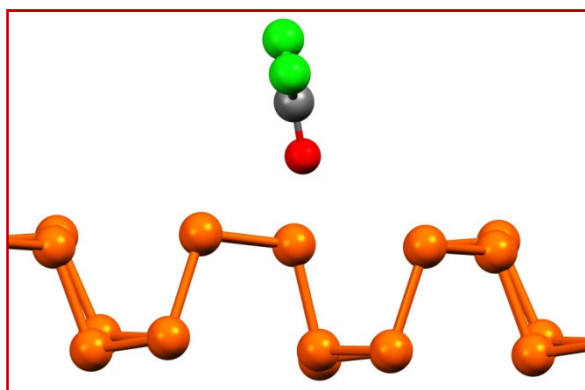

P2b (Side View)

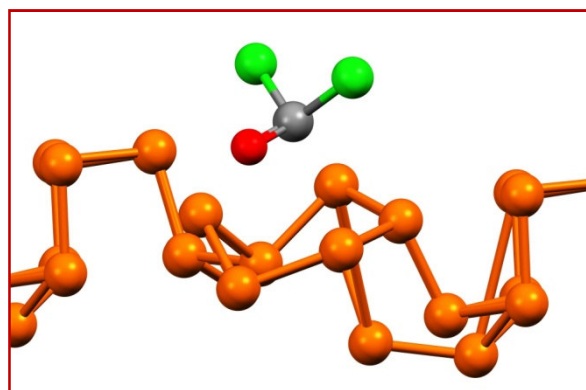

P2c (Side View)

**Figure S1.** Contd.

**Table S1.** Calculated adsorption and binding energies (eV) for alternative adsorption structures of less thermodynamic favorability for the phosgene molecule on phosphorene-based sensors at the HSE06/TZVP level of theory.

| Structure | $\Delta E_{\text{ads}}$ (eV) | $\Delta E_{\text{b}}$ (eV) |
|-----------|------------------------------|----------------------------|
| P1a       | -0.04                        | 0.05                       |
| P2a       | -0.12                        | 0.05                       |
| P2b       | -0.12                        | 0.05                       |
| P2c       | 1.24                         | 3.85                       |
